# Supplementary material for: Opioidergic modulation of stress-induced hyperalgesia in adult zebrafish
Source: J Neural Transm (Vienna). 2026 May 26;133(7):1739–54. doi: 10.1007/s00702-026-03159-3 (PMC13428717; doi:10.1007/s00702-026-03159-3)
Supplement: Supplementary file 1 — Supplementary Material 1 [file 702_2026_3159_MOESM1_ESM.docx]

## **Supplementary Information**

Opioidergic modulation of stress-induced hyperalgesia in adult zebrafish

Fabiano V. Costaa,b,c, h*, Lana Ferreirab, Lucca K. Limab, Julia Canziand,e, Allan V. Kalueff f,g,

Denis B. Rosembergd,e,g, Carla D. Bonana,b,c

aGraduate Program in Cellular and Molecular Biology, School of Health and Life Sciences, Pontifical Catholic University of Rio Grande Do Sul, Porto Alegre, RS, Brazil.

bLaboratory of Neurochemistry and Psychopharmacology, School of Health and Life Sciences, Pontifical Catholic University of Rio Grande do Sul, Porto Alegre, RS, Brazil.

cGraduate Program in Medicine and Health Sciences, School of Medicine, Pontifical Catholic University of Rio Grande Do Sul, Porto Alegre, RS, Brazil.

dLaboratory of Experimental Neuropsychobiology, Department of Biochemistry and Molecular Biology, Natural and Exact Sciences Center, Federal University of Santa Maria. Santa Maria, RS, Brazil.

eGraduate Program in Biological Sciences: Toxicological Biochemistry, Federal University of Santa Maria, Santa Maria, RS, Brazil.

fDepartment of Biosciences and Bioinformatics, Suzhou Municipal Key Laboratory of Neurobiology and Cell Signaling, Xi’an Jiaotong-Liverpool University, Suzhou, China

gInternational Zebrafish Neuroscience Research Consortium (ZNRC), New Orleans, USA

hUndergraduate Program in Nursing, La Salle University, Canoas, RS, Brazil

*Correspondence to: Fabiano V. Costa, Ph.D., Pontifical Catholic University of Rio Grande do Sul, Ipiranga Avenue, 6681, Building 12D/301.Porto Alegre, RS, Brazil. [fvcosta88@gmail.com](mailto:fvcosta88@gmail.com)


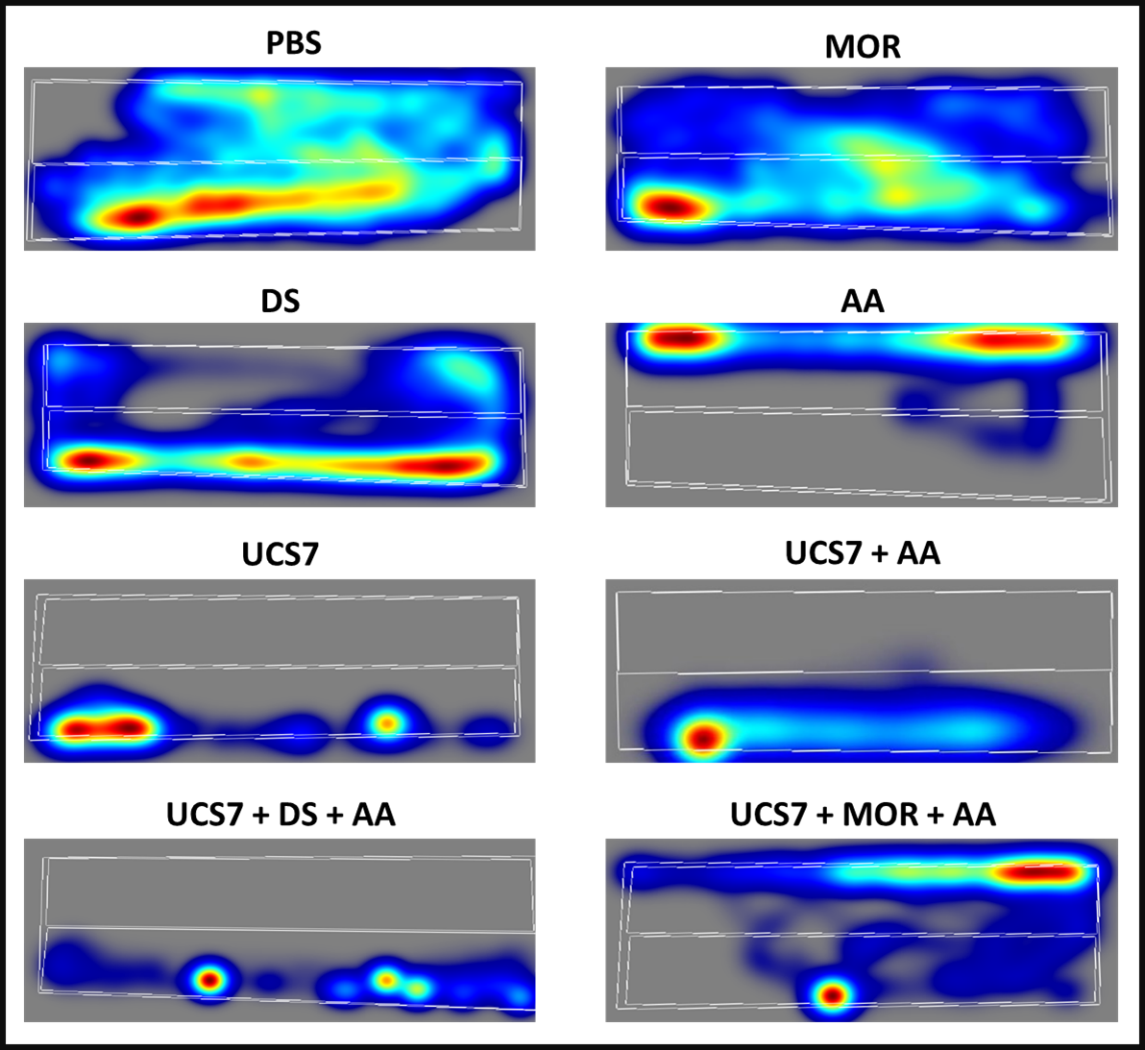

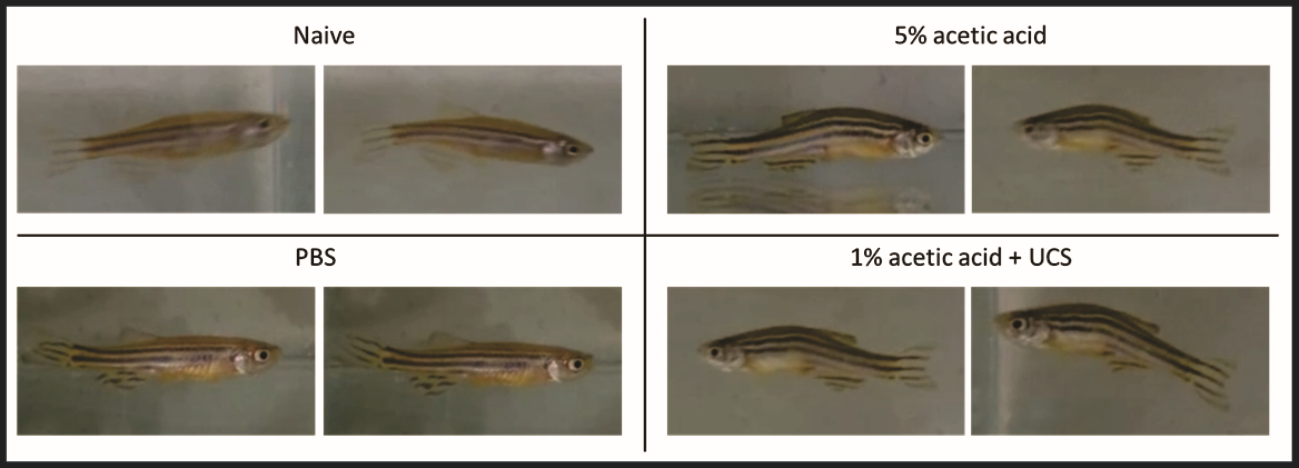
**Supplementary Fig. 1.** Representative images displaying the zebrafish phenotypes after acetic acid injection, as well as the effects of acetic acid plus UCS protocol in relation to PBS group.

**Supplementary Fig. 2.** Representative heatmap of zebrafish locomotor profiles under main treatments.
